# Supplementary material for: The Glycoprotein M6a Is Associated with Invasiveness and Radioresistance of Glioblastoma Stem Cells
Source: MDPI journal article supplement (doi:10.3390/cells11142128), 2022-07-06
Supplement: s1 [file s1]

| GBSC  | Spheres formation<br>In vitro | Differentiation<br>In vitro | Tumor<br>In vivo | Subtype | GBSC markers expression<br>(SOX2, Olig2) |
|-------|-------------------------------|-----------------------------|------------------|---------|------------------------------------------|
| GSC01 | +                             | +                           | +                | PN      | yes                                      |
| GSC02 | +                             | +                           | +                | PN      | yes                                      |
| GSC03 | +                             | +                           | +                | PN      | yes                                      |
| GSC04 | +                             | +                           | +                | PN      | yes                                      |
| GSC05 | +                             | +                           | +                | PN      | yes                                      |
| GSC06 | +                             | +                           | +                | PN      | yes                                      |
| GSC07 | +                             | +                           | +                | PN      | yes                                      |
| GSC08 | +                             | +                           | +                | MES     | yes                                      |
| GSC09 | +                             | +                           | +                | PN      | yes                                      |
| GSC10 | +                             | +                           | +                | MES     | yes                                      |
| GSC11 | +                             | +                           | +                | PN      | yes                                      |
| GSC12 | +                             | +                           | +                | PN      | yes                                      |
| GSC13 | +                             | +                           | +                | PN      | yes                                      |
| GSC14 | +                             | +                           | +                | MES     | yes                                      |

**Table S1: GBSC characterization.** GBSC isolated from patient specimen were characterized for their ability of self-renewal by sphere formation assays in vitro, their pluripotent aptitude to differentiate into neural lineages in vitro (Differentiation), their high tumorigenic potential in vivo by orthotopic xenograft in nude mice (Tumor in vivo) and the overexpression of stem cell markers (SOX2, OLIG2). The subtype proneural (PN) or mesenchymal (MES) was also determined.
