# Supplementary material for: The Glycoprotein M6a Is Associated with Invasiveness and Radioresistance of Glioblastoma Stem Cells
Source: MDPI journal article supplement (doi:10.3390/cells11142128), 2022-07-06
Supplement: s1 [file s1]

**A**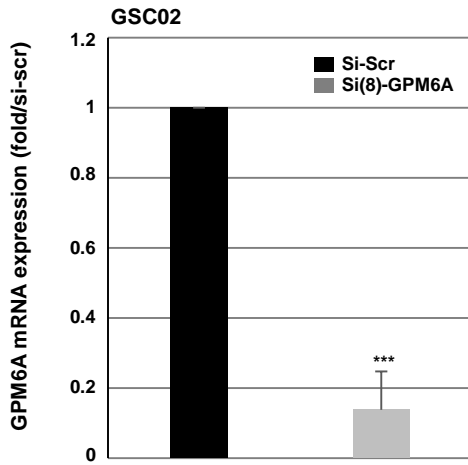**B**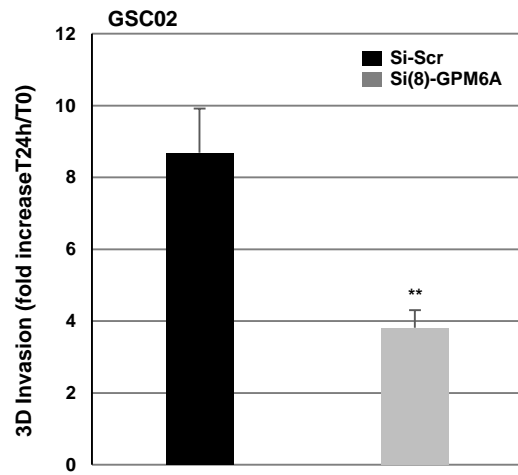

**Figure S2. Checking of a potential off target effect with GPM6A siRNA.** (A, B) GSC02 primary neurospheres were transfected with a specific siRNA (si(8)-GPM6A or a scramble control (si-Scr) as indicated. (A) GPM6A mRNA expression was analyzed by real time PCR. (B) Quantification of 3 D tumor cells invasion was performed with GC02 primary neurospheres as described in « Methods ». Quantifications of 3 experiments are presented as means SD. \*\*\* $P < 0.001$ ; \*\* $0.001 < P < 0.01$ .
